# Supplementary material
Source: publisher figshare collection journal article supplement (https://sage.figshare.com/ndownloader/files/18531389)
Supplement: Supplementary file 1 [file 18531389]

## Sheet: ADL education studies CT
Table : Experimental design ADL education studies
References	Scope	Design, participants and response rate	Setting and year of study	Interventions	Intervention time-scale	Intakes	Measures	Statistics	Results	Quality score (28)
Rice, et al., 2014	ADL education: preservation of UL health in MWC users with SCI	Single blinded RCT, N=37 volunteers, Randomization: IG (%):12(32.4), SCG (%):25(67.5), eligible first-time manual WH users with SCI, recruited from 93 candidates, Age: 38.3 (SD: 15.9) years, had a non-progressive SCI with neurological deficits, were anticipated to be full-time WH users, and scored >17/25 on a modified Meni-Mental State Examination.	Inpatient rehabilitation setting, March 2007-December 2011	IG: In addition to standard care, reveived a WH education protocol (clinical practice guidelines, structured, multifacited, and interactive education, Handouts, pictures, and videos), provided by 1 PT and 1 OT, CG: received a standard care	Allthrough stay in inpatient, 3-4 hours per day during PT and OT intervetnions	T1: at discharge from inpatient rehabilitation, T2: at 6 months postdischarge, T3: at 1 year postdischarge	WH setup, WH selection, WH propulsion biomechanics (Smart-Wheel), Pain using Wheelchair Users Shoulder Pain Index (WUSPI) and Numeric Pain Rating Scale (NRS), Satisfaction With Life Scale (SWLS), Craig Handicap Assessment and Reporting Techniques (CHART)	Independent variable: Clinical practice guidelines for preservation of UL function, Dependent variables: WH setup, WH selection, Propulsion biomechanics (tiles, carpet and ramp), Pain, Satisfaction with life, and Participation. SPSS (V.19) and SAS Proc Mixed repeated-measures program, Significance Priori: P=.05, Trends: P=.10, Tests: Shapiro-Wilk test for normality of distribution, Mixed-model an…	IG: showed better skills on key WH propulsion biomechanics variables related to UL health (MWC propulsion on tile and ramp, positive impact on carpet but didn't reach significance). MWC propulsion: (a) on the tile lower push frequency (p=.02), (IG: N=10, m=.74±.16), (SCG: N=18, m=.95±.24), (b) on the carpet a simple main effect trent, intervention group had lower push frequency (p=.10), (IG: N=9,…	23
									No significant difference was seen in WH setup (p>.05: 0.295-0.898), WH selection (p>.05: 0.130-0.755), pain, satisfaction with life, and participation (p>.05).
Rice, et al., 2013	ADL education: Transfer quality in new full-time WH users with SCI	Single blinded, RCT, N=70 volunteers, Randomization: IG (%):32(45.7), SCG (%):38(54.3), eligible first-time WH users with SCI, recruited from 280 candidates, Age: 46.5 (SD: 16.7) years, had a non-progressive SCI with neurological deficits, were anticipated to be full-time WH users, and scored >17/25 on a modified Meni-Mental State Examination.	Inpatient rehabilitation setting, University of Pittsburgh Medical Center Rehabilitation Institute in Pittsburgh, Pennsylvania, March 2007-December 2012	IG: In addition to standard care, reveived a transfer education protocol (clinical practice guidelines, Clinical practice guidelines for preservation of upper limb function), provided by 1 PT and 1 OT, CG: received a standard care	Allthrough stay in inpatient	Four times during the first year after injury, T1: at discharge from inpatient rehabilitation, T2: at 6 weeks postdischarge, T3: at 6 months postdischarge, and T4: at 1 year postdischarge	Transfer Assessment Instrument (TAI)	Independent variable: Clinical practice guidelines for preservation of UL function, Dependent variables: WH transfer (TAI). SPSS (V.19) and SAS Proc Mixed repeated-measures program, Significance: P=.05, Tests: Shapiro-Wilk test for normality of distribution, Mixed-model analysis of variance, Chi-square/Fisher exact analysis.	Transfer quality across all the times didn't reach significance IG (mean±SE: 8.73±.6) compared with SCG (mean±SE: 8.35±.14), P=.075, assisted sitting pivot transfer was higher quality in IG (mean±SE: 9.43±.55) compared with SCG (mean±SE: 7.81±.46), P=.026, dependent transfer was higher quality in IG (mean±SE: 9.14±.34) compared with SCG (mean±SE: 8.09±.29), P=.019	23
Ljungberg, et al., 2011	Impact of SCI education (involving ADL education) on self-efficacy and prevention of medical complications	Quasi-experimental, non-random, uncontrolled pretest/post-test, Participants: newly acquired SCI resulted in moderate to severe neurological deficits, N=24 (out of 37 enrolled in the study, 13 dropout mainly due to disconnected phone numbers), Eligibility: minimum age 18 years, admitted to NRH within one year of SCI, motivation to regularly interact with their peer mentor, ability to communicate …	National Rehabilitation Hospital in Washington DC	A oneyear peer mentoring program led by 5 mentors (four peer mentors and one supervisor mentor, two mentors were more than 10 years postinjury). The program includs education on WH transfers during inpatient care and on discharge the aim was tracking medical complications and assisting SCI individuals with adjusting to life after SCI.	Weekly contacts take place for three months, followed by three months of biweekly contacts and six months of monthly contact (total of one year contact). For the first three months, newly enrolled mentees met with their mentor weekly in person at the hospital or over the phone. After discharge mentors contact mentees by phone or meet in person if needed.	T1: on entering the program, T2: six months after enrolment	The General Self-Efficacy Scale (GSEF), Medical Complications Tracking Form (MCTF), Neuropathic Pain Intensity Rating Scale, and A qualitative in-depth exit interview	Independent variable: Peer mentoring program, Dependent variables: Self-efficacy (GSEF) and Secondary medical complications (MCTF). SPSS (V.15), Non-parametric statistics, Tests: Difference in GSEF at zero and 6 months: Mann-Whitney U test, Rates of secondary complications/MCTF (two periods: 0-6 months, 7-12 months): Wilcoxon test, Pain (Neuropathic Pain Intensity Rating Scale, NPS): Wilcoxon tes…	GSEF: 0-6 month: 67% of the subjects increased their GSEF score, but the result didn’t reach significance, Mann–Whitney U-test was significant (z=-2.5, p=.013) with education 9th grade and higher. Results for other subgroups were insignificant, Pain (Neuropathic Pain Intensity Rating Scale, NPS): Wilcoxon test was significant (P=.001).	15
							Medical complications		Medical complications (MCTF): doctor visits and medical complications decreased between 0-6 months and 7-12 months, P: .001-.046
							Exit interview with mentees		Mentees were satisfied and perceived the mentors as very knowledgeable about how to successfully live with SCI and secondary complications after SCI. Mentees provided an average rate of 4.22 on five-point Likert scale, with five being ‘excellent’. Suggestions: on how to improve the programme included more extensive in person contact and community outings such as riding the metro and visiting a re…
Kennedy and Hamilton, 1999	Impact of the Needs Assessment Goal Planning Program on independence	Quasi-experimental, non-random, uncontrolled pretest/post-test, 82 adults diagnosed with SCI, mean age of participants 41 years (range: 16 and 74)	Inpatient rehabilitation setting (National spinal injuries centre in the United Kingdom), between July 1994 and December 1997	The Nees assessment Goal Planning Program	The mean time from admission to the first Needs Assessment was 92.5 days (range 6 ± 245 days), and the mean time between the first and the second Needs Assessment was 95 days (range 17 ± 235 days).	T1: within 2 weeks of patient being mobilised, T2: upon patient transfer to the pre-discharge ward	The Needs Assessment Checklist	Independent variable: Needs Assessment and Goal Planning Program, Dependent variables: nine domains of Needs Assessment Checklist including 216 indicators, Non-parametric statistics, Tests: difference between means of two intakes of NAC : Wilcoxon test, Significance was not reported.	At the time of the second Needs Assessment independence was significantly greater and needs were significantly lower after rehabilitation in all 9 domains, Wilcoxon test for nine domains of NAC P<.0001.	7
PT: Physiotherapst, OT: Occupational therapist, IG: Intervention group, CG: Control group, ADL: Activities of Daily Living, WH: Wheelchair, UL: Upper limb, MWC: Manual wheelchair
MWC= Manual wheelchair, CPG=Clinical Practice Guidelines
WH= Wheelchair
IG= Intervention group, SCG=Standard care group
WUSPI=Wheelchair Users Shoulder Pain Index, NRS=Numeric Rating Scale
TAI=Transfer Assessment Instrument
NAC=Needs assessment checklist
WUSPI=Wheelchair Users Shoulder Pain Index
SWLS=Satisfaction With Life Scale, CHART=Craig Handicap Assessment and Reporting Techniques

## Sheet: Meta-analysis
Data	Variables	Rice, et al., 2014	Rice, et al., 2013	Ljungberg, et al., 2011	Kennedy and Hamilton, 1999
Age (y):	mean ±	38.3	46.5	35.38	41
	SD	15.9	16.7	Range in years (19-69)	Range in years (16-74)
Length of stay (d):	mean ±	40.1	41.7	Not reported	Not reported
	SD	14.5	18.9	Not reported	Not reported
Gender	Male (%):	28(75.7)	51(72.9)	28(76)	59(72%)
	Female (%):	9(24.3)	19(27.1)	9(24)	23(28%)
Level of injury	Paraplegia (%):	34(91.9)	43(61.4)	23(62)	28 (34%)
	Tetraplegia (%):	3(8.1)	27(38.6)	14(38)	54(66%)
ASIA	A (%):	20(54.1)	Not reported	NR	Not reported
	B (%):	4(10.8)	Not reported	NR	Not reported
	C (%):	8(21.6)	Not reported	NR	Not reported
	D (%):	2(5.4)	Not reported	NR	Not reported
	Not rated (%):	3(8.1)	Not reported	NR	Not reported
Response rate		37 out of 93 (39.8%)	70 out of 280 (25%)	24 out of 37 (64.9%)	Not reported
Completed study (%):		22(59.5)	45(64.3)	24(64.9)	Not reported
Withdrawal (%):		15(40.5)	25(35.7)	13(35.1)	Not reported
Education determinants
Level of education:	< 9th grade education	P>.05	P>.05	p>.05	Not reported
	9th grade and higher			z=-2.5, P=.013	Not reported
Age		P>.05	P>.05	P=.122	Not reported
Gender		P>.05	P>.05	P=.522	Not reported
Marrital status		P>.05	P>.05	P=.814	Not reported
Aetiology		P>.05	P>.05	P=.145	Not reported
Level of injury		P>.05	P>.05	P=.058	Not reported
Preemployment status		P>.05	P>.05	P=.471	Not reported

## Sheet: Bias
References	Sampling bias	Counteractive measures	Measurement bias	Counteractive measures	Other types of bias	Validity of measures	Reliability of measures	Ethical approval	Participation consent
Rice, et al., 2014	Limited eligibility criterion reduces matching	Participants scored >17/25 on a modified Meni-Mental State Examination. A stratifeid sample was used.	Risk of maturity bias due to age and long length of stay in inpatient: other positive or negative factors intervening with treatment outcomes	Participants scored >17/25 on a modified Meni-Mental State Examination. A stratifeid sample was used.	Contamination bias: familarity of health professionals with educational programe (intervention)	The educational protocol was made clear, concise, sufficiently detailed, and easily understood and then organized into education modules. Satisfaction with life and participation tools (SWLS and CHART) were valid	Not reported	Obtained	Written consent was obtained
	High rate of withdraws (34) and drop outs (22) out of 93, 15 (40.5%) out of 37 withdrew before completing study as no longer being a full-time WC user, No withdrawal due to intervention, complications, death or transportation accessibility.	Some of patients (7) were no longer wheelchaire users	Single blinded	Educators (1 physical therapist and 1 occupational therapist) followed a strict education protocol.
	Randomization scheme produced unequal study groups		Manual wheelchair propulsion testing in two different environment: in hospital and at home	Strict criteria to assure matching of two surfaces
			Frequent change of wheelchair during inpatient stay
Rice, et al., 2013	Moderate size sample, high withdrawal rate (35.7%) due to acute nature of study participants	Equal randomization	TAI has moderate reliability		Exposure bias: interaction of musculoskeletal and neuropathic pain, counteractive measure: equal randomization	Not reported	Moderate reliability, Interrater test: .642, intrarater test: .35-.89	Obtained	Written consent was obtained
	High withdraw at one year (50%)				Contamination bias: familarity of health professionals with educational programe (intervention)
Ljungberg, et al., 2011	Small, non-random, uncontrol sample, A formal assessment of the motivation or the linguistic competence of peer mentor candidates was not performed which reduces matching.	Motivation and communication ability were assessed during the conversations that took place during the interview and training process.	Using self-report data		Maturation bias (the study took one year)			Obtained
Kennedy and Hamilton, 1999	Non-random, uncontrol sample				Maturation and exposure biases			Not reported

## Sheet: Data quality
	Downs SH, Black N (1998). The feasibility of creating a checklist for the assessment of the methodological quality both of randomised and non-randomised studies of health care interventions. J Epidemiol Community Health, 52:377–384.
	Checklist for measuring study quality (Downs and Black, 1998)
A	Reporting	Assessment	Score
1	Is the hypothesis/aim/objective of the study clearly described?	Yes (1)/No (0)
2	Are the main outcomes to be measured clearly described in the Introduction or Methods section? If the main outcomes are first mentioned in the Results section, the question should be answered no.	Yes (1)/No (0)
3	Are the characteristics of the patients included in the study clearly described ? In cohort studies and trials, inclusion and/or exclusion criteria should be given. In case-control studies, a case-definition and the source for controls should be given.	Yes (1)/No (0)
4	Are the interventions of interest clearly described? Treatments and placebo (where relevant) that are to be compared should be clearly described.	Yes (1)/No (0)
5	Are the distributions of principal confounders in each group of subjects to be compared clearly described? A list of principal confounders is provided.	Yes (2)/Partially (1)/No (0)
6	Are the main findings of the study clearly described? Simple outcome data (including denomina- tors and numerators) should be reported for all major findings so that the reader can check the major analyses and conclusions. (This question does not cover statistical tests which are considered below).	Yes (1)/No (0)
7	Does the study provide estimates of the random variability in the data for the main outcomes? In non normally distributed data the inter-quartile range of results should be reported. In normally distributed data the standard error, standard deviation or confi- dence intervals should be reported. If the distribution of the data is not described, it must be assumed that the estimates used were appr…	Yes (1)/No (0)
8	Have all important adverse events that may be a consequence of the intervention been reported? This should be answered yes if the study demonstrates that there was a comprehen- sive attempt to measure adverse events. (A list of possible adverse events is provided).	Yes (1)/No (0)
9	Have the characteristics of patients lost to follow-up been described? This should be answered yes where there were no losses to follow-up or where losses to follow-up were so small that findings would be unaVected by their inclusion. This should be answered no where a study does not report the number of patients lost to follow-up.	Yes (1)/No (0)
10	Have actual probability values been report- ed(e.g. 0.035 rather than <0.05) for the main outcomes except where the probability value is less than 0.001?	Yes (1)/No (0)
B	External validity: All the following criteria attempt to address the representativeness of the findings of the study and whether they may be generalised to the population from which the study subjects were derived.
11	Were the subjects asked to participate in the study representative of the entire population from which they were recruited? The study must identify the source popu- lation for patients and describe how the patients were selected. Patients would be representative if they comprised the entire source population, an unselected sample of consecutive patients, or a random sam- ple. Random sampling is o…	yes (1)/No (0)/unable to determine (0)
12	Were those subjects who were prepared to par- ticipate representative of the entire population from which they were recruited? The proportion of those asked who agreed should be stated. Validation that the sample was representative would include demonstrating that the distribution of the main confounding factors was the same in the study sample and the source popula- tion.	yes (1)/No (0)/unable to determine (0)
13	13. Were the staV, places, and facilities where the patients were treated, representative of the treatment the majority of patients receive? For the question to be answered yes the study should demonstrate that the inter- vention was representative of that in use in the source population. The question should be answered no if, for example, the intervention was undertaken in a specialist centre un…	yes (1)/No (0)/unable to determine (0)
C	Internal validity - bias
14	Was an attempt made to blind study subjects to the intervention they have received ? For studies where the patients would have no way of knowing which intervention they received, this should be answered yes.	yes (1)/No (0)/unable to determine (0)
15	Was an attempt made to blind those measuring the main outcomes of the intervention?	yes (1)/No (0)/unable to determine (0)
16	If any of the results of the study were based on “data dredging”, was this made clear? Any analyses that had not been planned at the outset of the study should be clearly indicated. If no retrospective unplanned subgroup analyses were reported, then answer yes.	yes (1)/No (0)/unable to determine (0)
17	In trials and cohort studies, do the analyses adjust for diVerent lengths of follow-up of patients, or in case-control studies, is the time period between the intervention and outcome the same for cases and controls ? Where follow-up was the same for all study patients the answer should yes. If diVerent lengths of follow-up were adjusted for by, for example, survival analysis the answer should be…	yes (1)/No (0)/unable to determine (0)
18	Were the statistical tests used to assess the main outcomes appropriate? The statistical techniques used must be appropriate to the data. For example non- parametric methods should be used for small sample sizes. Where little statistical analysis has been undertaken but where there is no evidence of bias, the question should be answered yes. If the distribution of the data (normal or not) is not …	yes (1)/No (0)/unable to determine (0)
19	Was compliance with the intervention/s reli- able? Where there was non compliance with the allocated treatment or where there was contamination of one group, the question should be answered no. For studies where the eVect of any misclassification was likely to bias any association to the null, the question should be answered yes.	yes (1)/No (0)/unable to determine (0)
20	Were the main outcome measures used accurate (valid and reliable)? For studies where the outcome measures are clearly described, the question should be answered yes. For studies which refer to other work or that demonstrates the outcome measures are accurate, the ques- tion should be answered as yes.	yes (1)/No (0)/unable to determine (0)
D	Internal validity - confounding (selection bias)
21	Were the patients in diVerent intervention groups (trials and cohort studies) or were the cases and controls (case-control studies) recruited from the same population? For example, patients for all comparison groups should be selected from the same hospital. The question should be answered unable to determine for cohort and case- control studies where there is no informa- tion concerning the sour…	yes (1)/No (0)/unable to determine (0)
22	Were study subjects in diVerent intervention groups (trials and cohort studies) or were the cases and controls (case-control studies) recruited over the same period of time? For a study which does not specify the time period over which patients were recruited, the question should be answered as unable to determine.	yes (1)/No (0)/unable to determine (0)
23	Were study subjects randomised to intervention groups? Studies which state that subjects wereran- domised should be answered yes except where method of randomisation would not ensure random allocation. For example alternate allocation would score no be- cause it is predictable.	yes (1)/No (0)/unable to determine (0)
24	Was the randomised intervention assignment concealed from both patients and health care staV until recruitment was complete and irrevocable? All non-randomised studies should be answered no. If assignment was concealed from patients but not from staV, it should be answered no.	yes (1)/No (0)/unable to determine (0)
25	Was there adequate adjustment for confound- ing in the analyses from which the main find- ings were drawn? This question should be answered no for trials if: the main conclusions of the study were based on analyses of treatment rather than intention to treat; the distribution of known confounders in the diVerent treat- ment groups was not described; or the dis- tribution of known confounders diVe…	yes (1)/No (0)/unable to determine (0)
26	Were losses of patients to follow-up taken into account? If the numbers of patients lost to follow-up are not reported, the question should be answered as unable to determine. If the proportion lost to follow-up was too small to aVect the main findings, the question should be answered yes.	yes (1)/No (0)/unable to determine (0)
E	Power
27	Did the study have suYcient power to detect a clinically important eVect where the probabil- ity value for a diVerence being due to chance is less than 5%? Sample sizes have been calculated to detect a diVerence of x% and y%.		Size of smallest intervention group
		A	<n1	0
		B	n1–n2	1
		C	n3–n4	2
		D	n5–n6	3
		E	n7–n8	4
		F	n8+	5
	This is in essence similar to a power calculation. Decide on what constitutes a clinically or socially significant difference between the two groups being compared (eg difference in desired outcome 60% versus 50% success). Select a probability value for such a difference – we suggest 5% as commonly accepted value. Select a range of study powers against which you want to assess papers. These are r…
	Study quality scores using Downs and Black scale: checklist for measuring study quality (n=4)
	Study	1	2	3	4	5	6	7	8	9	10	11	12	13	14	15	16	17	18	19	20	21	22	23	24	25	26	27	Quality
	Rice, et al., 2014	1	1	1	1	2	1	1	1	1	1	1	1	1	0	1	1	1	1	1	1	1	0	1	0	1	0	0	23
	Rice, et al., 2013	1	1	1	1	2	1	1	1	1	1	1	1	1	0	1	1	1	1	1	1	1	0	1	0	1	0	0	23
	Ljungberg, et al., 2011	1	1	1	1	2	1	0	1	0	0	0	0	1	0	0	1	1	1	1	1	0	0	0	0	1	0	0	15
	Kennedy and Hamilton, 1999	0	1	1	1	0	0	0	0	0	0	0	0	0	0	0	0	0	1	1	1	0	0	0	0	1	0	0	7

## Sheet: Forest plots
Study (subgroup)	IG		SCG		P		IG			SCG
	N	M(SE)	N	M(SE)			M	SE	SD	M	SE	SD
Rice, et al., 2014 (MWC propulsion on tile)	10	0.74±0.16	18	0.95±0.24	0.02		0.74	0.16	0.505964	0.95	0.24	1.01823
Rice, et al., 2014 (MWC propulsion on carpet)	9	0.80±0.14	17	0.95±0.20	0.1		0.8	0.14	0.42	0.95	0.2	0.824621
Rice, et al., 2014 (MWC propulsion on ramp)	12	65.40±22.99	17	50.12±24.00	0.03		65.4	22.99	79.6397	50.12	24	98.9545
Rice, et al., 2014 (WH setup-Axle position)	7	1.5	10	2.85	0.652		1.5		0	2.85		0
Rice, et al., 2014 (WH setup-Elbow flexion)	7	114.86	11	106.45	0.295		114.86		0	106.45		0
Rice, et al., 2014 (WH Type: depote/lightweight)	5	0	9	2	0.505		0		0	2		0
Rice, et al., 2014 (WH Type: ultralight)	5	5	9	7			5		0	7		0
Rice, et al., 2014 (WH Status: own)	7	7	11	9	0.359		7		0	9		0
Rice, et al., 2014 (WH Status: loan)	7	0	11	2			0		0	2		0
Rice, et al., 2014 (WH Weight)	5	15.822	10	16.32	0.755		15.822		0	16.32		0
Rice, et al., 2014 (Pain: NRS)	7	1.64±2.43	11	1.41±2.50	0.95		1.64	2.43	6.42918	1.41	2.5	8.29156
Rice, et al., 2014 (Pain: WUSPI)	7	25.99±33.26	11	16.85±35.90	0.56		25.99	33.26	87.9977	16.85	35.9	119.067
Rice, et al., 2013	32	8.73±0.6	38	8.35±0.14	0.075		8.73	0.6	3.39411	8.35	0.14	0.863018
Study ID	IG N	IG Mean	SCG N	SCG Mean	P-Value
Rice, et al., 2013	32	8.73	38	8.35	0.075
Rice, et al., 2014 (MWC propulsion on carpet)	9	0.8	17	0.95	0.1
Rice, et al., 2014 (MWC propulsion on ramp)	12	65.4	17	50.12	0.03
Rice, et al., 2014 (MWC propulsion on tile)	10	0.74	18	0.95	0.02
Rice, et al., 2014 (Pain: NRS)	7	1.64	11	1.41	0.95
Rice, et al., 2014 (Pain: WUSPI)	7	25.99	11	16.85	0.56
Rice, et al., 2014 (WH setup-Axle position)	7	1.5	10	2.85	0.652
Rice, et al., 2014 (WH setup-Elbow flexion)	7	114.86	11	106.45	0.295
Rice, et al., 2014 (WH Status: loan)	7	0	11	2	0.359
Rice, et al., 2014 (WH Status: own)	7	7	11	9	0.359
Rice, et al., 2014 (WH Type: depote/lightweight)	5	0	9	2	0.505
Rice, et al., 2014 (WH Type: ultralight)	5	5	9	7	0.505
Rice, et al., 2014 (WH Weight)	5	15.822	10	16.32	0.755

## Sheet: Results summary
Study	Independnet variable	Dependent variable	N	Test	Significance (P)
Rice, et al., 2014	CPG: Preservation of UL function following SCI	Wheelchair setup	37	Mixed-model analysis of variance, Chi-square/Fisher exact analysis	P>.05 : 0.295-0.898
		Wheelchair selection			P>.05: 0.130-0.755
		Wheelchair biomechanics (ambulation on tile)			p=.02
		Wheelchair biomechanics (ambulation on carpet)			p=.10
		Wheelchair biomechanics (ambulation on ramp)			p=.03
		Pain (Numeric Rating Scale, NRS)			P>.05
		Pain (Wheelchair Users Shoulder Pain Index, WUSPI)			P>.05
		Satisfaction With Life Scale (SWLS)			P>.05
		Participation (Craig Handicap Assessment and Reporting Techniques, CHART)			P>.05
Rice, et al., 2013		Transfer (Transfer Assessment Instrument, TAI)	70		P=.075
Ljungberg, et al., 2011	Peer Mentoring at the National Rehabilitation Hospital (NRH)	The General Self-Efficacy Scale (GSEF)	24	Mann-Whitney U test	P>.05
		Medical Complications Tracking Form (MCTF)		Wilcoxon test	P: .001-.046
		Pain (Neuropathic Pain Intensity Rating Scale, NPS)		Wilcoxon test	P=.001
Kennedy and Hamilton, 1999	The Needs Assessment and Goal Planning Program (NAGPP)	The Needs Assessment Checklist (NAC): ADL domain	82	Wilcoxon test	P<.0001
			213
